# Supplementary material for: Label-free concurrent 5-modal microscopy (Co5M) resolves unknown spatio-temporal processes in wound healing
Source: Springer Nature journal article supplement (doi:10.1038/s42003-021-02573-5), 2021-09-06
Supplement: MOESM3 [file 42003_2021_2573_MOESM3_ESM.pdf › 42003_2021_2573_MOESM3_ESM.pdf]

## Description of Additional Supplementary Files

**File name:** Supplementary Data 1.

**Description:** Source data for the charts shown in Fig. 4a-c and h-o capturing Co5M's spatio-temporal assessments of the wound healing process.
